# Supplementary material for: Calcium Oxalate and Gallic Acid: Structural Characterization and Process Optimization toward Obtaining High Contents of Calcium Oxalate Monohydrate and Dihydrate
Source: MDPI journal article supplement (doi:10.3390/cryst11080954), 2021-08-15
Supplement: s1 [file s1]

## Supplementary Material for

### Calcium Oxalate and Gallic Acid: Structural Characterization and Process Optimization Toward Obtaining High Contents of Calcium Oxalate Monohydrate and Dihydrate

Silvija Šafranko<sup>1</sup>, Sara Goman<sup>2</sup>, Dominik Goman<sup>2</sup>, Stela Jokić<sup>1</sup>, Ida Delač Marion<sup>3</sup>, Nives Matijaković Mlinarić<sup>4</sup>, Atida Selmani<sup>5</sup>, Martina Medvidović-Kosanović<sup>2,\*</sup>, Anamarija Stanković<sup>2,\*</sup>

<sup>1</sup> Faculty of Food Technology Osijek, Josip Juraj Strossmayer University of Osijek, Franje Kuhača 18, 31000 Osijek, Croatia; silvija.safranko@ptfos.hr (S.Š.); sjokic@ptfos.hr (S.J.)

<sup>2</sup> Department of Chemistry, Josip Juraj Strossmayer University of Osijek, Cara Hadrijana 8/A, 31000 Osijek, Croatia; sgoman@kemija.unios.hr (S.G.); dominik.goman@kemija.unios.hr (D.G.); martina.medvidovic@gmail.com (M.M.K.); ster.anamarija@gmail.com (A.S.)

<sup>3</sup> Center of Excellence for Advanced Materials and Sensing Devices, Institute of Physics, Bijenička cesta 46, 10000 Zagreb, Croatia; idelac@ifs.hr (I.D.M.)

<sup>4</sup> Laboratory for Precipitation Processes, Division of Materials Chemistry, Ruđer Bošković Institute, Bijenička cesta 54, 10000 Zagreb, Croatia; nives.matijakovic@irb.hr (N.M.M.)

<sup>5</sup> Laboratory for Biocolloids and Surface Chemistry, Ruđer Bošković Institute, Bijenička Cesta 54, 10000 Zagreb, Croatia; selmani.atida@gmail.com (A.Selmani)

\*Correspondence: ster.anamarija@gmail.com (A.S.); martina.medvidovic@gmail.com (M.M.K.)

## Content of listed material

**Table S1.** Thermogravimetric analysis results of the precipitates in systems from 1 – 17 runs and model systems ( $t_0$  - initial degradation temperature,  $t_{\max}$  - temperature of maximum degradation rate,  $t_e$  - end of degradation temperature)

**Table S2.** IR vibration bands (in  $\text{cm}^{-1}$ ) of calcium oxalate standards (calcium oxalate monohydrate (COM), dihydrate (COD) and trihydrate (COT)) [28,29].

**Table S3.** Analysis of variance (ANOVA) of second-order polynomial models for obtaining COM content in the samples.

**Table S4.** Analysis of variance (ANOVA) of second-order polynomial models for obtaining COD content in the samples

**Figure S1.** SEM images of calcium oxalate hydrates

**Figure S2.** Cyclic voltammograms of phosphate buffer pH = 6.5 (—) **a)** Run 16 (—) and Run 16 with added gallic acid ( $c = 0.02 \text{ mM}$ ) (—) **b)** calcium oxalate precipitate (Blank sample (—) and Run 4 (—). Scan rate 100 mV/s.

Table S1.

| Simple system | <i>1<sup>st</sup> step</i> |                             |                        | <i>total 1<sup>st</sup> step</i> | <i>2<sup>nd</sup> step</i> |                             |                        | <i>total 2<sup>nd</sup> step</i> |
|---------------|----------------------------|-----------------------------|------------------------|----------------------------------|----------------------------|-----------------------------|------------------------|----------------------------------|
|               | $t_0 / ^\circ\text{C}$     | $t_{\max} / ^\circ\text{C}$ | $t_e / ^\circ\text{C}$ | $\Delta m / \%$                  | $t_0 / ^\circ\text{C}$     | $t_{\max} / ^\circ\text{C}$ | $t_e / ^\circ\text{C}$ | $\Delta m / \%$                  |
| 1             | 39.55                      | 55.46                       | 79.68                  | 1.76                             | 79.54                      | 142.48                      | 196.06                 | 11.51                            |
| 2             | 46.08                      | 140.67                      | 200.87                 | 12.78                            | -                          | -                           | -                      | -                                |
| 3             | 41.44                      | 54.65                       | 74.78                  | 1.19                             | 74.51                      | 142.84                      | 196.67                 | 11.54                            |
| 4             | 40.48                      | 40.54                       | 84.32                  | 2.36                             | 84.45                      | 132.51                      | 195.71                 | 18.65                            |
| 5             | 43.04                      | 54.73                       | 80.77                  | 0.66                             | 80.49                      | 144.28                      | 200.98                 | 12.52                            |
| 6             | 39.99                      | 137.90                      | 195.97                 | 13.08                            | -                          | -                           | -                      | -                                |
| 7             | 65.68                      | 146.36                      | 196.21                 | 12.69                            | -                          | -                           | -                      | -                                |
| 8             | 42.74                      | 141.38                      | 197.12                 | 13.47                            | -                          | -                           | -                      | -                                |
| 9             | 39.88                      | 68.07                       | 92.07                  | 6.45                             | 92.76                      | 138.18                      | 196.35                 | 11.51                            |
| 10            | 40.42                      | 66.88                       | 88.57                  | 4.70                             | 88.71                      | 141.63                      | 195.35                 | 11.12                            |
| 11            | 39.75                      | 62.75                       | 87.32                  | 4.13                             | 87.32                      | 143.89                      | 195.98                 | 11.13                            |
| 12            | 42.98                      | 71.10                       | 93.03                  | 8.80                             | 92.75                      | 133.87                      | 200.89                 | 10.41                            |
| 13            | 42.26                      | 79.06                       | 97.32                  | 12.28                            | 97.32                      | 135.76                      | 200.69                 | 8.57                             |
| 14            | 60.22                      | 137.25                      | 196.17                 | 21.35                            | -                          | -                           | -                      | -                                |
| 15            | 60.56                      | 146.96                      | 200.37                 | 21.84                            | -                          | -                           | -                      | -                                |
| 16            | 40.93                      | 55.92                       | 79.91                  | 1.51                             | 79.64                      | 142.83                      | 195.39                 | 12.13                            |
| 17            | 42.98                      | 71.10                       | 93.03                  | 8.80                             | 92.75                      | 133.87                      | 200.89                 | 10.41                            |
| model COM     | 66.58                      | 144.08                      | 196.95                 | 11.77                            | -                          | -                           | -                      | -                                |
| model COD     | 45.58                      | 149.08                      | 202.95                 | 19.87                            | -                          | -                           | -                      | -                                |

**Table S2**

| COM       | COD         | COT  | Vibrational mode                                  |
|-----------|-------------|------|---------------------------------------------------|
| 3483      | 3469        | 3528 | $\nu(\text{OH})$                                  |
| 3429      |             | 3427 |                                                   |
| 3336      |             | 3222 |                                                   |
| 3258      |             |      | $2\delta(\text{HOH})$                             |
| 3058      |             |      | $\nu(\text{OH})$                                  |
| 1624-1622 | 1640 - 1638 | 1636 | $\nu_a(\text{CO})$                                |
|           | 1470        |      |                                                   |
| 1384      |             |      | $\nu_s(\text{CO})$                                |
| 1368      |             |      |                                                   |
| 1320-1316 | 1324        | 1324 |                                                   |
| 958-889   |             |      | $\text{L}(\text{H}_2\text{O})$                    |
|           | 912         |      | $\nu_s(\text{CO}) + \text{L}(\text{H}_2\text{O})$ |
| 782       | 782         | 783  | $\delta(\text{OCO})$                              |
| 656       | 630         | 651  | $\text{L}(\text{HOH})$                            |

$\nu$  – stretching;  $\delta$  – bending;  $a$ -antisymmetric;  $s$  – symmetric; L - libration.

Table S3

| Source                                      | Sum of Squares | Degree of Freedom (df) | Mean Square | F-Value | <i>p</i> -Value <sup>a</sup> |
|---------------------------------------------|----------------|------------------------|-------------|---------|------------------------------|
| Model                                       | 17037.19       | 9                      | 1893.02     | 21.12   | 0.0003                       |
| <i>X</i> <sub>1</sub> - Temperature         | 2370.85        | 1                      | 2370.85     | 26.45   | 0.0013                       |
| <i>X</i> <sub>2</sub> – System pH           | 4876.67        | 1                      | 4876.67     | 54.41   | 0.0002                       |
| <i>X</i> <sub>3</sub> – Added gallic acid   | 5666.01        | 1                      | 5666.01     | 63.22   | < 0.0001                     |
| <i>X</i> <sub>1</sub> <i>X</i> <sub>2</sub> | 2154.40        | 1                      | 2154.40     | 24.04   | 0.0017                       |
| <i>X</i> <sub>1</sub> <i>X</i> <sub>3</sub> | 377.97         | 1                      | 377.97      | 4.22    | 0.0791                       |
| <i>X</i> <sub>2</sub> <i>X</i> <sub>3</sub> | 1283.61        | 1                      | 1283.61     | 14.32   | 0.0069                       |
| <i>X</i> <sub>1</sub> <sup>2</sup>          | 72.87          | 1                      | 72.87       | 0.8131  | 0.3972                       |
| <i>X</i> <sub>2</sub> <sup>2</sup>          | 222.41         | 1                      | 222.41      | 2.48    | 0.1592                       |
| <i>X</i> <sub>3</sub> <sup>2</sup>          | 28.53          | 1                      | 28.53       | 0.3183  | 0.5902                       |
| Residual                                    | 627.39         | 7                      | 89.63       |         |                              |
| Lack of fit                                 | 457.18         | 3                      | 152.39      | 3.58    | 0.1248                       |
| Pure error                                  | 170.21         | 4                      | 42.55       |         |                              |
| Total                                       | 17664.59       | 16                     |             |         |                              |
| <i>R</i> <sup>2</sup>                       | <b>0.9645</b>  |                        |             |         |                              |

<sup>a</sup> *p* < 0.01 highly significant; 0.01 ≤ *p* < 0.05 significant; *p* ≥ 0.05 not significant.

Table S4

| Source                    | Sum of Squares | Degree of Freedom (df) | Mean Square | F-Value | <i>p</i> -Value <sup>a</sup> |
|---------------------------|----------------|------------------------|-------------|---------|------------------------------|
| Model                     | 18316.52       | 9                      | 2035.17     | 28.73   | 0.0001                       |
| $X_1$ - Temperature       | 4223.36        | 1                      | 4223.36     | 59.61   | 0.0001                       |
| $X_2$ – System pH         | 5472.04        | 1                      | 5472.04     | 77.24   | < 0.0001                     |
| $X_3$ – Added gallic acid | 3091.97        | 1                      | 3091.97     | 43.64   | 0.0003                       |
| $X_1X_2$                  | 1986.13        | 1                      | 1986.13     | 28.04   | 0.0011                       |
| $X_1X_3$                  | 1969.5         | 1                      | 1969.5      | 27.8    | 0.0012                       |
| $X_2X_3$                  | 1504.35        | 1                      | 1504.35     | 21.23   | 0.0025                       |
| $X_1^2$                   | 12.94          | 1                      | 12.94       | 0.1826  | 0.682                        |
| $X_2^2$                   | 3.46           | 1                      | 3.46        | 0.0489  | 0.8313                       |
| $X_3^2$                   | 47.45          | 1                      | 47.45       | 0.6697  | 0.4401                       |
| Residual                  | 495.91         | 7                      | 70.84       |         |                              |
| Lack of fit               | 1.15           | 3                      | 0.3844      | 0.0031  | 0.9997                       |
| Pure error                | 494.76         | 4                      | 123.69      |         |                              |
| Total                     | 18812.43       | 16                     |             |         |                              |
| <b><math>R^2</math></b>   | <b>0.9736</b>  |                        |             |         |                              |

<sup>a</sup>  $p < 0.01$  highly significant;  $0.01 \leq p < 0.05$  significant;  $p \geq 0.05$  not significant.

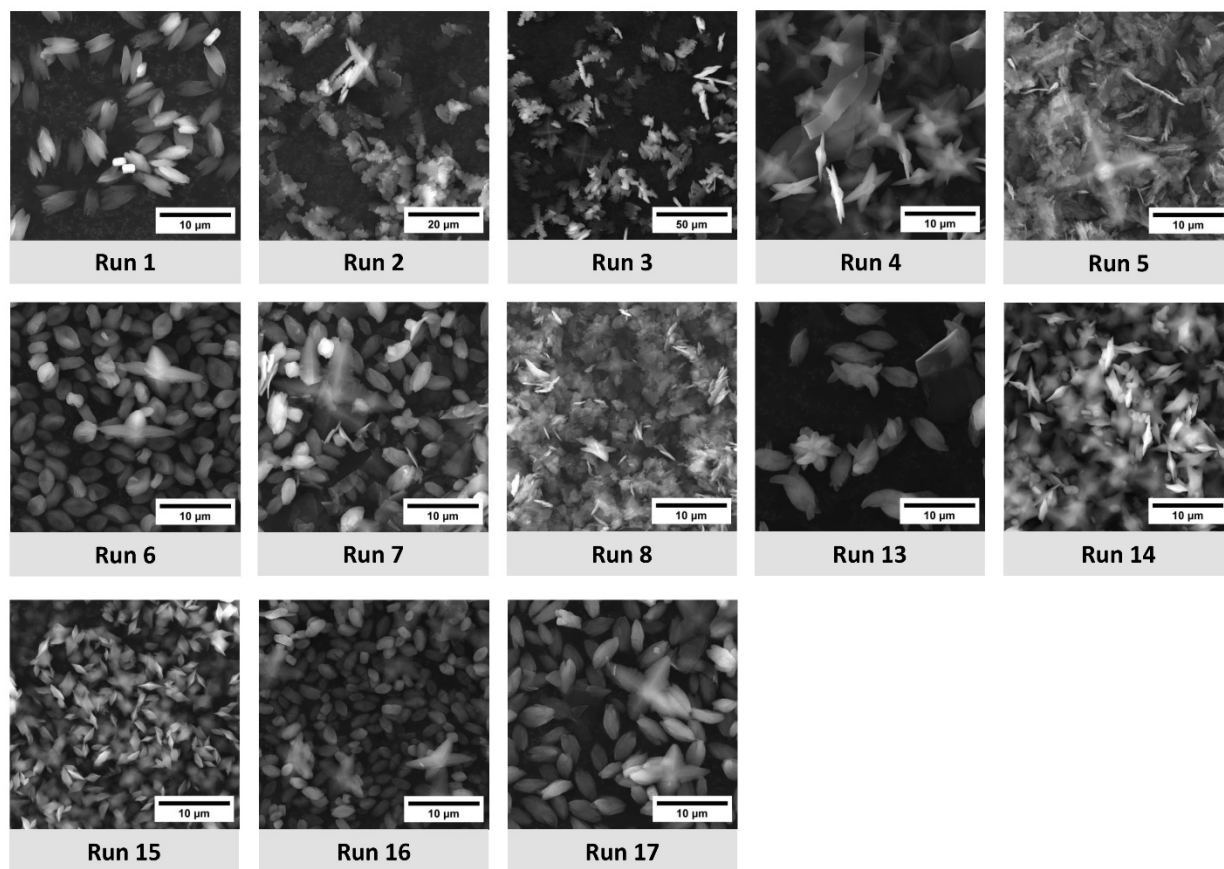

Figure S1.

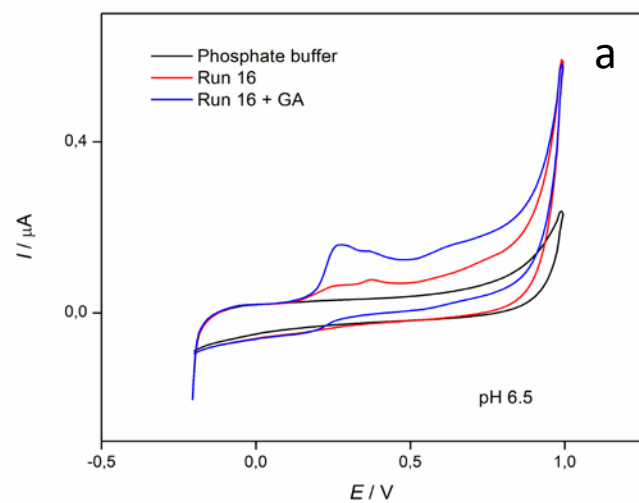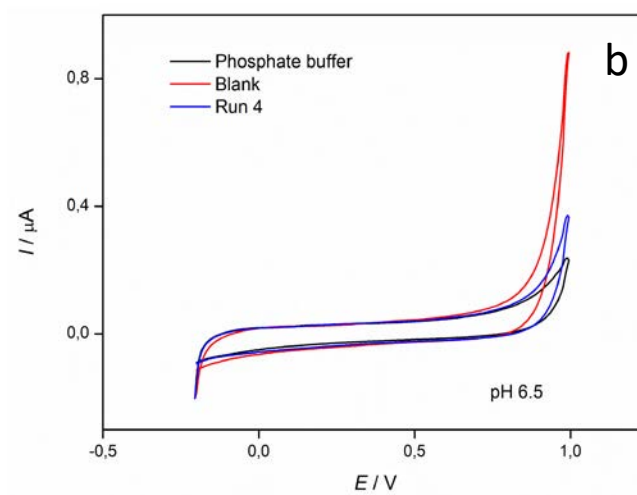

Figure S2.
